# Supplementary material for: Serum Lactate Dehydrogenase Level One Week after Admission Is the Strongest Predictor of Prognosis of COVID-19: A Large Observational Study Using the COVID-19 Registry Japan
Source: MDPI journal article supplement (doi:10.3390/v15030671), 2023-03-02
Supplement: s1 [file s1]

**Supplementary Table S1.** Factors associated with in-hospital mortality selected for the multivariate analysis using the stepwise method (including laboratory values on day 1 \*)

| Variables                | Estimate | Standard Error | $\chi^2$ | p-Value |
|--------------------------|----------|----------------|----------|---------|
| Sex                      | −0.4091  | 0.1119         | 13,374   | <0.001  |
| Age                      | 0.0919   | 0.0053         | 295.152  | <0.001  |
| BMI                      | 0.0161   | 0.0128         | 1.583    | 0.18    |
| Cardiovascular diseases  | 0.5373   | 0.1409         | 14,547   | <0.001  |
| Respiratory diseases     | 0.4889   | 0.1385         | 12,454   | <0.001  |
| Liver diseases           | 0.6836   | 0.2553         | 7.172    | 0.008   |
| Renal diseases           | 0.4112   | 0.2791         | 2.170    | 0.15    |
| Neoplasms                | 0.6049   | 0.1531         | 15,610   | <0.001  |
| Diabetes mellitus        | 0.3371   | 0.1118         | 9.090    | 0.004   |
| Cerebrovascular diseases | 0.3071   | 0.1368         | 5.040    | 0.03    |
| Lymphocytes_day1         | −0.0409  | 0.0056         | 54,199   | <0.001  |
| Creatinine_day1          | 0.1471   | 0.0338         | 18,975   | <0.001  |
| Platelets_day1           | −0.0020  | 0.0006         | 10,660   | 0.001   |
| CK_day1                  | 0.0001   | 0.0000         | 3.561    | 0.05    |
| CRP_day1                 | 0.0010   | 0.0005         | 3.826    | 0.06    |

\* Day 1 refers to the day when the patient was admitted to the hospital. Abbreviations: BMI, body mass index; CI, confidence interval; CK, creatine kinase; CRP, C-reactive protein; LDH, lactate dehydrogenase; OR, odds ratio; WBC, white blood cell.

**Supplementary Table S2** Factors associated with in-hospital mortality selected for the multivariate analysis using the stepwise method (including laboratory values on days 1 and 8)

| Variables                | Adjusted OR | 95% CI |    |       | $\chi^2$ |
|--------------------------|-------------|--------|----|-------|----------|
| Sex                      | 0.804       | 0.624  | to | 1.036 | 2.836    |
| Age                      | 1.085       | 1.071  | to | 1.100 | 150,602  |
| BMI                      | 0.972       | 0.944  | to | 1.000 | 3.733    |
| Cardiovascular diseases  | 1.575       | 1.146  | to | 2.164 | 7.851    |
| Respiratory diseases     | 1.562       | 1.144  | to | 2.133 | 7.862    |
| Liver diseases           | 1.640       | 0.901  | to | 2.988 | 2.618    |
| Renal diseases           | 1.495       | 0.817  | to | 2.734 | 1.700    |
| Neoplasms                | 1.816       | 1.281  | to | 2.576 | 11,202   |
| Diabetes mellitus        | 1.446       | 1.123  | to | 1.864 | 8.151    |
| Cerebrovascular diseases | 1.386       | 1.018  | to | 1.888 | 4.306    |
| LDH_day8                 | 1.006       | 1.005  | to | 1.007 | 250,747  |
| lymphocyte_day8          | 0.893       | 0.875  | to | 0.911 | 127,419  |
| CRP_day8                 | 1.018       | 1.011  | to | 1.026 | 25,150   |
| Platelets_day8           | 0.998       | 0.997  | to | 0.999 | 10,983   |
| Creatinine_day1 *        | 1.098       | 1.017  | to | 1.186 | 5.679    |
| CK_day8                  | 1.000       | 0.999  | to | 1.000 | 4.739    |
| CRP_day1                 | 1.001       | 1.000  | to | 1.002 | 1.638    |

\* Day 1 refers to the day when the patient was admitted to the hospital. Abbreviations: BMI, body mass index; CI, confidence interval; CK, creatine kinase; CRP, C-reactive protein; LDH, lactate dehydrogenase; OR, odds ratio; WBC, white blood cell.

**Supplementary Table S3** Predictive characteristics of in-hospital mortality based on LDH values on admission day 8 ( $n = 8860$ )

| LDH Threshold (U/L) | Sensitivity | Specificity | PPV    | NPV    | True Negative | True Positive | False Negative | False Positive |
|---------------------|-------------|-------------|--------|--------|---------------|---------------|----------------|----------------|
| 100                 | 99.58%      | 0.27%       | 5.35%  | 92.00% | 23            | 473           | 2              | 8362           |
| 150                 | 99.37%      | 6.82%       | 5.70%  | 99.48% | 572           | 472           | 3              | 7813           |
| 200                 | 97.47%      | 31.10%      | 7.42%  | 99.54% | 2608          | 463           | 12             | 5777           |
| 220                 | 96.42%      | 42.52%      | 8.68%  | 99.53% | 3565          | 458           | 17             | 4820           |
| 222                 | 95.79%      | 43.32%      | 8.74%  | 99.45% | 3632          | 455           | 20             | 4753           |
| 250                 | 92.21%      | 57.89%      | 11.04% | 99.24% | 4854          | 438           | 37             | 3531           |
| 300                 | 84.00%      | 76.31%      | 16.73% | 98.83% | 6399          | 399           | 76             | 1986           |
| 320                 | 80.84%      | 80.94%      | 19.37% | 98.68% | 6787          | 384           | 91             | 1598           |
| 330                 | 78.74%      | 82.85%      | 20.64% | 98.57% | 6947          | 374           | 101            | 1438           |
| 333                 | 77.89%      | 83.59%      | 21.19% | 98.52% | 7009          | 370           | 105            | 1376           |
| 350                 | 73.26%      | 86.44%      | 23.43% | 98.28% | 7248          | 348           | 127            | 1137           |
| 400                 | 59.16%      | 92.52%      | 30.95% | 97.56% | 7758          | 281           | 194            | 627            |
| 440                 | 50.95%      | 94.94%      | 36.34% | 97.16% | 7961          | 242           | 233            | 424            |
| 444                 | 49.68%      | 95.17%      | 36.82% | 97.09% | 7980          | 236           | 239            | 405            |
| 660                 | 17.68%      | 99.22%      | 56.38% | 95.51% | 8320          | 84            | 391            | 65             |

Abbreviations: LDH, lactate dehydrogenase; NPV, negative predictive value; PPV, positive predictive value.

**Supplementary Table S4** Clinical prediction models for in-hospital mortality based on the multivariate analysis

| (A) Baseline model (excluding laboratory values from the analysis)           |          |                |          |
|------------------------------------------------------------------------------|----------|----------------|----------|
| Variables                                                                    | Estimate | Standard Error | $\chi^2$ |
| Sex                                                                          | −0.5693  | 0.1086         | 27,479   |
| Age                                                                          | 0.0906   | 0.0051         | 310,676  |
| BMI                                                                          | 0.0112   | 0.0126         | 0.781    |
| Cardiovascular diseases                                                      | 0.5097   | 0.1390         | 13,440   |
| Respiratory diseases                                                         | 0.5265   | 0.1354         | 15,117   |
| Liver diseases                                                               | 0.5982   | 0.2533         | 5579     |
| Renal diseases                                                               | 1.2967   | 0.2081         | 38,813   |
| Neoplasms                                                                    | 0.6127   | 0.1500         | 16,671   |
| Diabetes mellitus                                                            | 0.4022   | 0.1095         | 13,498   |
| Cerebrovascular diseases                                                     | 0.3138   | 0.1344         | 5452     |
| (B) Model incorporating laboratory values on day 8 using the stepwise method |          |                |          |
| Variables                                                                    | Estimate | Standard Error | $\chi^2$ |
| Sex                                                                          | −0.2408  | 0.1297         | 3448     |
| Age                                                                          | 0.0809   | 0.0066         | 148,767  |
| BMI                                                                          | −0.0289  | 0.0148         | 3826     |
| Cardiovascular diseases                                                      | 0.4500   | 0.1628         | 7634     |
| Respiratory diseases                                                         | 0.4208   | 0.1596         | 6948     |
| Liver diseases                                                               | 0.4781   | 0.3058         | 2446     |
| Renal diseases                                                               | 0.6267   | 0.2778         | 5090     |
| Neoplasms                                                                    | 0.5977   | 0.1782         | 11,249   |
| Diabetes mellitus                                                            | 0.3983   | 0.1290         | 9530     |
| Cerebrovascular diseases                                                     | 0.3262   | 0.1576         | 4285     |
| LDH on day 8                                                                 | 0.0061   | 0.0004         | 249,514  |
| Lymphocytes on day 8                                                         | −0.1145  | 0.0100         | 130,211  |
| CRP on day 8                                                                 | 0.0185   | 0.0035         | 27,868   |
| Platelet count on day 8                                                      | −0.0019  | 0.0005         | 11,916   |
| CK on day 8                                                                  | −0.0003  | 0.0002         | 4942     |

| Creatinine day 8                                            | 0.0487          | 0.0309                | 2487                       |
|-------------------------------------------------------------|-----------------|-----------------------|----------------------------|
| <b>(C) Baseline model plus LDH on day 8</b>                 |                 |                       |                            |
| <b>Variables</b>                                            | <b>Estimate</b> | <b>Standard Error</b> | <b><math>\chi^2</math></b> |
| Sex                                                         | −0.4235         | 0.1238                | 11,710                     |
| Age                                                         | 0.0932          | 0.0062                | 224,880                    |
| BMI                                                         | −0.0305         | 0.0149                | 4211                       |
| Cardiovascular diseases                                     | 0.5624          | 0.1552                | 13,126                     |
| Respiratory diseases                                        | 0.4887          | 0.1533                | 10,163                     |
| Liver diseases                                              | 0.3732          | 0.3057                | 1491                       |
| Renal diseases                                              | 1.2710          | 0.2366                | 28,858                     |
| Neoplasms                                                   | 0.6276          | 0.1730                | 13,162                     |
| Diabetes mellitus                                           | 0.4443          | 0.1253                | 12,574                     |
| Cerebrovascular diseases                                    | 0.2911          | 0.1517                | 3679                       |
| LDH on day 8                                                | 0.0082          | 0.0004                | 501,267                    |
| <b>(D) Baseline model plus lymphocyte fraction on day 8</b> |                 |                       |                            |
| <b>Variables</b>                                            | <b>Estimate</b> | <b>Standard Error</b> | <b><math>\chi^2</math></b> |
| Sex                                                         | −0.2723         | 0.1171                | 5410                       |
| Age                                                         | 0.0741          | 0.0058                | 164,609                    |
| BMI                                                         | 0.0042          | 0.0132                | 0.102                      |
| Cardiovascular diseases                                     | 0.3971          | 0.1507                | 6948                       |
| Respiratory diseases                                        | 0.4307          | 0.1456                | 8750                       |
| Liver diseases                                              | 0.6336          | 0.2713                | 5452                       |
| Renal diseases                                              | 0.6490          | 0.2224                | 8515                       |
| Neoplasms                                                   | 0.5871          | 0.1614                | 13,242                     |
| Diabetes mellitus                                           | 0.3232          | 0.1168                | 7651                       |
| Cerebrovascular diseases                                    | 0.3431          | 0.1437                | 5698                       |
| Lymphocyte day 8                                            | −0.1751         | 0.0098                | 322,203                    |

The day of hospitalization is set as day 1. Abbreviations: BMI, body mass index; CK, creatine kinase; CRP, C-reactive protein; LDH, lactate dehydrogenase; WBC, white blood cell.
